**Title: A *Bbs5* mouse model reveals pituitary cilia contributions to developmental abnormalities.**

**Authors:** Melissa R. Bentley<sup>1</sup>, Staci E. Engle<sup>2</sup>, Courtney J. Haycraft<sup>1</sup>, Reagan S. Andersen<sup>1</sup>, Mandy J. Croyle<sup>1</sup>, Kelsey R. Clearman<sup>1</sup>, Addison B. Rains<sup>1</sup>, Nicolas F. Berbari<sup>2</sup>, Bradley K. Yoder<sup>1\*</sup>

<sup>1</sup> Department of Cell, Developmental and Integrative Biology, University of Alabama at Birmingham, Birmingham, AL 35294.

<sup>2</sup> Department of Biology, Indiana University-Purdue University Indianapolis, Indianapolis Indiana, 46202;

\*Corresponding

**Corresponding:**

Bradley K. Yoder, Ph.D.

Department of Cell, Developmental and Integrative Biology

McCallum Basic Health Sciences Building

Room 688

1918 University Blvd

Birmingham, AL 35294-0005

Phone: (205) 934-0994

FAX: (205) 934-0950

Email: [byoder@uab.edu](mailto:byoder@uab.edu)

1 **Abstract:**

2 Primary cilia are critical sensory and signaling compartments present on most mammalian cell  
3 types. These specialized structures require a unique signaling protein composition relative to the  
4 rest of the cell to carry out their functions. Defects in ciliary structure and signaling result in a  
5 broad group of disorders collectively known as ciliopathies. One ciliopathy, Bardet-Biedl  
6 Syndrome (BBS; OMIM 209900), presents with diverse clinical features, many of which are  
7 attributed to defects in ciliary signaling during both embryonic development and postnatal life.  
8 For example, patients exhibit obesity, polydactyly, hypogonadism, developmental delay, and  
9 skeletal abnormalities along with sensory and cognitive deficits, but for many of these  
10 phenotypes it is uncertain which are developmental in origin. A subset of BBS proteins  
11 assembles into the BBSome complex, which is responsible for mediating transport of membrane  
12 proteins into and out of the cilium, establishing it as a sensory and signaling hub. Here we  
13 describe two new mouse models for BBS resulting from a congenital null and conditional allele  
14 of *Bbs5*. *Bbs5* null mice develop a complex phenotype including craniofacial defects, skeletal  
15 shortening, ventriculomegaly, infertility, and pituitary anomalies. Utilizing the conditional allele,  
16 we show that the male fertility defects, ventriculomegaly, and pituitary abnormalities are only  
17 found when *Bbs5* is mutated prior to P7 indicating a developmental origin. In contrast, mutation  
18 of *Bbs5* results in obesity independent of the age of *Bbs5* loss. Compared to other animal  
19 models of BBS, *Bbs5* mutant mice exhibit pathologies that suggest a specialized role for *Bbs5*  
20 in ciliary function.

21

## 22 **Introduction:**

23 Primary cilia are microtubule-based structures that emanate from the surface of nearly  
24 every mammalian cell type. The ciliary membrane is enriched in a unique set of membrane  
25 proteins and signaling components that sets it apart from the cell membrane (1). This enrichment  
26 cultivates a highly specialized and responsive sensory and signaling hub for the cell. The  
27 accumulation of the proper signal transduction components at the ciliary membrane is crucial for  
28 cilia function and ultimately depends on the cooperation of several macromolecular machines,  
29 one of which is the BBSome. The BBSome is an octameric complex containing BBS1, BBS2,  
30 BBS4, BBS5, BBS7, BBS8, BBS9 and BBS18/ BBIP10 (2, 3). Interactions between Intraflagellar  
31 Transport Protein IFT22 (also known as RABL5) and BBS3 (also known as Arl6) are then  
32 responsible for the recruitment of the BBSome to the base of the cilium via interactions with the  
33 BBS1 subunit (4-6). The recruitment process is also aided by Rab8, the Rab8-specific GEF,  
34 Rabin8, and Rab11 (2, 3, 7). BBS5 is structurally and functionally unique based on predictions  
35 that it may directly mediate membrane interactions through its two plextrin homology (PH)  
36 domains capable of binding to phosphoinositides (2). Based on BBS5's structure and physical  
37 interactions within the BBSome, it is unlikely that it is actually able to interact with the membrane  
38 via these PH domains (8). Thus, the functional role and importance of BBS5 in the BBSome  
39 remains poorly understood.

40 Bardet-Biedl Syndrome (BBS) patients exhibit a wide range of highly variable pathologies  
41 including but not limited to: obesity, hypogonadism, polydactyly, cognitive deficits, renal  
42 anomalies, and retinitis pigmentosa. To date, mutations in twenty-one different loci (BBS 1-21)  
43 have been associated with BBS. Mutations specifically affecting the core BBSome complex  
44 represent a large proportion of BBS patients (9), with 2% of the mutations occurring in *BBS5*  
45 (10). Previously, congenital mutant mouse models of BBSome components BBS1, BBS2,  
46 BBS4, BBS7, and BBS8 have been described and recapitulate several, but not all, of the  
47 phenotypes associated with the clinical features of the disorder. Additionally, a conditional allele  
48 for *Bbs1* has been described with phenotypes that recapitulate some of the clinical features (11-  
49 15). However, work done thus far in *Bbs5* models has been limited and only demonstrated minor  
50 retinal degeneration (16, 17). We sought to assess the pathophysiology of *Bbs5* loss of function  
51 alleles using congenital and conditional *Bbs5* mutant approaches. Our goal was to distinguish  
52 between phenotypes that are developmental in origin from those that occur as a consequence

53 of loss of BBS5 functions needed for tissue homeostasis in adults. To accomplish this goal, we  
54 analyzed phenotypic consequences of *Bbs5* disruption during development, in juvenile, and  
55 adult stages. We report phenotypes including: submendelian survival ratios, shortened  
56 skeletons, craniofacial defects, sterility, obesity, ventriculomegaly, persistence of the  
57 buccohypophyseal canal, and pituitary gland abnormalities. Out of these, obesity was unique in  
58 that it is the only phenotype seen in both the congenital allele and when *Bbs5* loss is induced  
59 after postnatal day 7, suggesting roles for *Bbs5* in both development and adult that can impact  
60 energy homeostasis. The phenotypes observed in *Bbs5* mutant mice described here are directly  
61 related to the pathologies presented by BBS patients, and provide the first whole animal  
62 validation of the *Bbs5* mutant mouse model as a valuable tool to further understand the  
63 molecular mechanisms resulting in the pathologies common to BBS.

64

## 65 **Materials and Methods:**

### 66 *Generation of Bbs5 mutant alleles*

67 All animal studies were conducted in compliance with the National Institutes of Health *Guide for*  
68 *the Care and Use of Laboratory Animals* and approved by the Institutional Animal Care and Use  
69 Committee at the University of Alabama at Birmingham. Mice were maintained on LabDiet<sup>®</sup> JL  
70 Rat and Mouse/Irr 10F 5LG5 chow. *Bbs5* knockout first ( $Bbs5^{tm1a(EUCOMM)Wtsi/+}$ ;  $Bbs5^{-/+}$ )  
71 embryonic stem cells, from C57BL/6NTac background mice, were obtained from Eucomm and  
72 injected into C57BL/6J (JAX Stock No: 000058) blastocysts to establish the  $Bbs5^{-/-}$  (*tm1a*) line.  
73 The allele was then maintained on the C57BL/6J strain. *Tm1c* conditional allele mice were  
74 generated by mating *tm1a* to FlpO recombinase mice (C57BL/6J) thus removing the LacZ and  
75 Neo cassettes and generating a conditional allele (*tm1c*; *flox*). Progeny that contained the  
76 recombined allele were crossed off of the FlpO line and bred to Cagg-Cre<sup>ERT2</sup> males (C57BL/6J)  
77 to generate the *tm1d* (delta) allele. Here we refer to these alleles as the *tm1a* ( $Bbs5^{-/-}$ ), *tm1c*  
78 ( $Bbs5^{flox/flox}$ ) and *tm1d* ( $Bbs5^{\Delta/\Delta}$ ) alleles. (**Figure 1A**). Primers used for genotyping are as follows  
79 for the *tm1a* allele: 5'-TTCAGTTGGTCAGTTTTGTATCGT-3', 5'-  
80 TCAGCACCGGATAACAGAGC-3', and 5'-CATAGTTGGCAGTGTTTGGGG-3' and for the *tm1c*  
81 and *tm1d* alleles: 5'- TGTTTTGTTGGTAGATGATGCATGGG-3', 5'  
82 CAGAGAAGCATTGGTAATAACCGAGC-3', 5'-TGAGGGTAGGAACGGAGCTCAGAG-3'.

83

84 *Embryo Isolation*

85 Timed pregnancies using *Bbs5*<sup>+/-</sup> animals were established with embryonic time-point of E0.5  
86 being noted at noon on the morning of observing the copulatory plug. To isolate embryos,  
87 pregnant females were anesthetized using isoflurane followed by cervical dislocation. Embryonic  
88 tissues or whole embryos were isolated and fixed in 4% paraformaldehyde (Sigma PFA, 158127)  
89 in PBS.

90

91 *Mouse embryonic fibroblast (MEF) Isolation*

92 Embryos were isolated at E13.5. Following the removal of the liver and head, embryos were  
93 mechanically dissociated and cultured in DMEM (Gibco, 11039-021) supplemented with 10%  
94 Fetal Bovine Serum, 1X Penicillin and Streptomycin, 0.05% Primocin, 3.6 $\mu$ l/0.5L  $\beta$ -  
95 mercaptoethanol. Cells were grown to confluency at which time media was changed to DMEM  
96 containing 0.5% FBS to induce cilia formation.

97

98 *Tissue Isolation and Histology*

99 Mice were anesthetized with 0.1 ml/ 10 g of body weight dose of 2.0% tribromoethanol (Sigma  
100 Aldrich, St. Louis, MO) and transcardially perfused with PBS followed by 4% paraformaldehyde  
101 (PFA; Affymetrix Inc., Cleveland, OH). Tissues were post-fixed in 4% PFA overnight at 4°C and  
102 then cryoprotected by submersion in 30% sucrose in PBS for 16–24 hours then cryosectioned  
103 for immunofluorescence and Hematoxylin (Fisher Chemical, SH26-500D) and Eosin (Sigma-  
104 Aldrich, HT110132-1L) staining was performed.

105

106 *Immunofluorescence microscopy*

107 Ten (10)  $\mu$ m tissue sections (brain sections were 35  $\mu$ m) were used for immunofluorescence  
108 microscopy. For staining MEFs, cells were grown on glass cover slips treated with 0.1% gelatin  
109 until confluent, then serum starved using DMEM containing 0.5% FBS for 24 hours to induce  
110 cilia formation (18). Sections were fixed with 4% PFA for 10 minutes, permeabilized with 0.1%  
111 Triton X-100 in PBS for 8 minutes and then blocked in a PBS solution containing 1% BSA, 0.3%  
112 TritonX-100, 2% (vol/vol) normal donkey serum and 0.02% sodium azide for one hour at room  
113 temperature. Primary antibody incubation was performed in blocking solution overnight at 4°C.  
114 Primary antibodies include: Acetylated  $\alpha$ -tubulin (Sigma, T7451) direct conjugated to Alexa 647

115 (Invitrogen, A20186) and used at 1:1000 , ACIII (Encor, CPCA-ACIII, 1:1000), Arl13b  
116 (Proteintech, 1771-1AP, 1:500), CCSP1 (Abcam, ab40873, 1:250), Mchr1 (Invitrogen, 711649,  
117 1:1000), PECAM1 (Abcam, ab7388, 1:250), and SPC1 (Millipore Corp, AB3786, 1:250).  
118 Cryosections were then washed with PBS three times for five minutes at room temperature.  
119 Secondary antibodies diluted in blocking solution were added for one hour at room temperature.  
120 Secondary antibodies included: Donkey conjugated Alexa Fluor 647, 488, and 594 (Invitrogen,  
121 1:1000). Samples were then washed in PBS and stained with Hoechst nuclear stain 33258  
122 (Sigma-Aldrich) for 5 minutes at room temperature. Cover slips were mounted using SlowFade  
123 Diamond Antifade Mountant (Life Technologies) for PVN and ARC sections and Immu-Mount  
124 (Thermo Scientific) for all others. Brain sections were imaged on a Leica SP8 confocal using  
125 60X objective (NA=1.4). All other fluorescence images were captured on Nikon Spinning-disk  
126 confocal microscope with Yokogawa X1 disk, using Hamamatsu flash4 sCMOS camera. 60x  
127 apo-TIRF (NA=1.49) or 20x Plan Flour Multi-immersion (NA=0.8) objectives were used. Images  
128 were processed using Nikon's Elements or Fiji software.

129

### 130 *Skeletal Preparations and bone measurements*

131 The skin and internal organs (except brain) of 2-month-old mice were removed and the skeletons  
132 were submerged in 1% KOH overnight at room temperature. Skeletons were rinsed and cleaned  
133 of further excess tissue and fresh KOH solution added. Skeletons were left in KOH solution  
134 until sufficient tissue could be removed. Skeletons were rinsed with water and placed in a  
135 solution of 1.6% KOH and 0.004% alizarin red for two days. Skeletons were rinsed with water  
136 and placed in clearing solution (2 volumes glycerol; 2 volumes 70% ethanol; 1 volume benzyl  
137 alcohol). Skeletons were then stored in 100% glycerol and imaged using a Nikon SMZ800 stereo  
138 microscope.

139

### 140 *Tamoxifen Cre Induction*

141 Recombination of the *tm1c* allele was induced in juvenile *Bbs5<sup>flox/flox</sup>; CAGG-cre<sup>ERT2</sup>* mice at  
142 postnatal day 7 by a single intraperitoneal (IP) injection of 9 mg tamoxifen (Millipore Sigma,  
143 T5648) per 40 g body weight. Tamoxifen was dissolved in corn oil. Adult animals were induced  
144 at 8 weeks old by IP injections of 6 mg/40 g (body weight) tamoxifen, administered once daily  
145 for three consecutive days.

146

### 147 *Sequencing*

148 Fluorescence based Sanger sequencing using the Illumina NextSeq500 Next Generation  
149 Sequencing (NGS) instrument at the Heflin Center for Genomic Sciences was performed on  
150 cDNA generated from brain, heart, lung, kidney, testes, and retinal extract in wild-type and *Bbs5*<sup>-</sup>  
151 <sup>-</sup> mice.

152

### 153 *MRI imaging*

154 Magnetic Resonance Imaging (9.4T) of post-mortem brains was conducted using T2 weighting  
155 (TE: 36 TR:1800). Imaging was performed on adult mice at two months of age. All imaging was  
156 performed at the UAB Small Animal Imaging Shared Facility. Images were analyzed using Horos  
157 and ImageJ software.

158

### 159 *Statistical Analysis*

160 Calculations were performed using Graphpad Prism and Microsoft Excel. Specific tests used are  
161 indicated in figure legends with significance indicated as follows: \* p≤0.05, \*\* p≤0.01, \*\*\* p≤0.001

162

## 163 **Results:**

### 164 *Bbs5*<sup>-</sup> mice have decreased viability but no defects in ciliogenesis

165 We first sought to verify that *Bbs5* is widely expressed using the *LacZ* cassette engineered into  
166 the *Bbs5*<sup>-</sup> allele (**Figure 1A**). However, we were unable to detect β-galactosidase staining in  
167 any tissue. We then investigated the expression of the targeted allele by RT-PCR in several  
168 tissues. Using primers located upstream of the cassette and within the *LacZ* gene, we were  
169 unable to detect a product. We therefore checked for expression of the *Bbs5* transcript using  
170 primers located in exons upstream and downstream of the cassette. Surprisingly, we identified  
171 a single transcript produced. Subsequent sequencing showed that the transcript produced from  
172 the *tm1a* allele uses an alternative splice site within the engineered exon and joins with exon  
173 four of the *Bbs5* gene, splicing around the *LacZ* coding sequence, explaining the lack of  
174 β-galactosidase staining. The aberrant transcript contains several in frame translational  
175 termination codons early in the sequence and is therefore predicted to be a null, or severe  
176 hypomorphic allele (**Figure 1B**).

177 Homozygous mutant mice (**Figure 1A**; *Bbs5*<sup>-/-</sup>) are viable but exhibit a significantly  
178 increased mortality by weaning age (P21) compared to heterozygous and wild type littermates  
179 (**Figure S1A**). Our studies indicate that during the final stages of embryonic development, E18.5-  
180 birth, all genotypes are present at the ratios expected from heterozygous matings ( $\chi^2(2, N=47;$   
181 7 litters)=3.09,  $p > 0.05$  progeny (**Figure S1A**)). However, Mendelian ratios reflect a significant  
182 reduction ( $\chi^2(2, N=141, 23$  litters)=19.93,  $p < 0.001$ ) in the observed number of mutant animals  
183 at weaning, (**Figure S1A**) indicating failure to thrive and perinatal lethality. By immunostaining  
184 for Arl13b and acetylated  $\alpha$ -tubulin, there were no overt differences detected in number or length  
185 of primary cilia in analyzed tissues, indicating that *Bbs5*<sup>-/-</sup> mutant mice do not display a general  
186 defect in ciliogenesis. *Bbs5*<sup>-/-</sup> cells form cilia at a similar frequency and with similar lengths as  
187 controls (**Figure S1B, C and D**).

188 BBS patients can present with highly variable phenotypes. This is thought to be related  
189 to the modifying effects of individual patients' different genetic backgrounds. In mice, it has been  
190 reported that phenotypes associated with mutations in other *Bbs* genes are also affected by  
191 genetic background (19). Previous reports of background-dependent lethality in BBS mutant  
192 mice have been attributed to neural tube closure defects and pulmonary developmental defects  
193 (20, 21). During embryo isolations, we never observed neural tube closure defects and  
194 Mendelian ratios were observed after neural tube closure (E18.5-birth). For these reasons, we  
195 went on to assess whether pulmonary developmental defects could be contributing to perinatal  
196 lethality in *Bbs5*<sup>-/-</sup> mice. Histological analysis of lungs at E18.5 do not show obvious differences  
197 in alveolar space or pulmonary interstitium (**Figure S2A**). Immunofluorescence staining for the  
198 alveolar type I cells, vasculature, and alveolar type II cells using antibodies against SPC1,  
199 PECAM1, and CCSP1, also did not reveal differences compared to control littermate lungs  
200 (**Figure S2B, C and D**). Thus, in contrast to other BBS mutant models, perinatal lethality in *Bbs5*<sup>-/-</sup>  
201 <sup>-/-</sup> mice is not associated with overt pulmonary defects.

202 Observationally, perinatal *Bbs5*<sup>-/-</sup> mice appear smaller. Similar to what has been  
203 observed in other BBS mouse models, growth retardation occurs during the first three weeks in  
204 mutant animals, allowing them to be easily distinguished from their littermates; this is possibly  
205 caused by the inability to nurse due to anosmia (15).

206

207 *Fertility defects in Bbs5 mutant animals.*



208 To determine if *Bbs5*<sup>-/-</sup> mutant mice were fertile, we performed homozygous by  
209 heterozygous matings. While both male and female heterozygous mice are fertile, no litters  
210 were produced when either the male or female was homozygous for the *Bbs5* mutant allele,  
211 indicating that both male and female *Bbs5*<sup>-/-</sup> mice are infertile. In other mouse models of BBS,  
212 infertility was associated with a lack of flagellated sperm (12). To investigate whether this could  
213 be the cause of the infertility in male *Bbs5*<sup>-/-</sup> mice, we isolated the testes and performed  
214 histological staining. In *Bbs5*<sup>-/-</sup> testes, no flagellated sperm were visible (**Figure 2A**).  
215 Furthermore, extraction of sperm from the epididymis of mutant mice also did not yield flagellated  
216 sperm, while isolation from wild-type and heterozygous animals did (**Supplemental video 1**).  
217 This could be a result of defects in flagella formation, sperm differentiation, or puberty defects  
218 related to disruption of the hypothalamic-pituitary-gonadal axis (22, 23).

219 To further evaluate whether this is a defect in development of the sperm versus  
220 maintenance, we utilized conditional *Bbs5*<sup>flox/flox</sup>; Cagg-Cre<sup>ERT2</sup> animals and induced *Bbs5* loss  
221 at either 7 days (P7) prior to sexual maturation or after at 8 weeks of age. Testes isolated from  
222 *Bbs5*<sup>Δ/Δ</sup> mice that had been induced at P7 and analyzed at least two months post induction  
223 showed a variable phenotype, where 5 out of 8 male mice did not develop flagellated sperm and  
224 3 mice did develop flagellated sperm. In 2 out of 3 of these mice, the number of flagellated sperm  
225 appeared reduced (**Figure 2B**). In the adult-induced (8 weeks) mutants analyzed 10 weeks post  
226 induction, flagellated motile sperm were present in all *Bbs5*<sup>Δ/Δ</sup> mice analyzed (N=5) (**Figure 2C**).  
227 These data indicate a developmental role for BBS5 during early spermatogenesis events, but  
228 not in sperm flagella maintenance.

229

### 230 *Bbs5* Mutant Obesity and Neuronal Cilia

231 As indicated, approximately one week following birth, surviving *Bbs5*<sup>-/-</sup> animals can be  
232 distinguished from their littermates due to their smaller size (data not shown). Over time, the  
233 surviving *Bbs5*<sup>-/-</sup> mutants not only catch up to their littermates with regards to body weight, but  
234 surpass them and become obese. To determine if the obesity observed in *Bbs5*<sup>-/-</sup> mutants was  
235 due to a developmental phenotype or a role for *Bbs5* in adult homeostasis, we utilized the *Bbs5*  
236 conditional allele (*Bbs5*<sup>flox/flox</sup>). Using the near ubiquitously expressed Cagg-Cre<sup>ERT2</sup> allele which  
237 has produced obesity phenotypes in other ciliopathy alleles, (24, 25) we analyzed adult  
238 phenotypes upon the conditional loss of BBS5 at P7 and 8 weeks of age. Both male and female

239 conditional mutant *Bbs5<sup>ΔΔ</sup>* animals become obese on breeder chow diet (10% crude fat)  
240 compared to their Cre negative controls (**Figure 3A**).

241 Other congenital BBS mutant mouse models develop obesity and display loss of POMC  
242 neuron labeling within the arcuate nucleus of the hypothalamus. This is consistent with either a  
243 loss of POMC neurons or a defect in leptin responsiveness in these mutants (26). However, in  
244 *Bbs5<sup>ΔΔ</sup>* mutant mice, immunofluorescence for the POMC neuronal marker β-endorphin did not  
245 reveal differences between controls and *Bbs5<sup>ΔΔ</sup>* mutants in cell numbers (**Figure 3B**) suggesting  
246 that the POMC neuronal population is intact and that there are no changes in cell number  
247 following to the onset of obesity. This is similar to what has been observed in other conditional  
248 cilia models and BBS mutants suggesting the loss of POMC neurons is due to alterations during  
249 neuronal development (27).

250 Both BBS2 and BBS4 are important for proper ciliary localization of G-protein coupled  
251 receptors like Melanin Concentrating Hormone Receptor 1 (MCHR1), which plays a role in  
252 feeding behavior and metabolism (28). Surprisingly, unlike *Bbs2* and *Bbs4* congenital knockout  
253 mice, *Bbs5<sup>ΔΔ</sup>* mice still localize MCHR1 to the cilium in the hypothalamus (**Figure 3C**)(28). While  
254 in the arcuate nucleus (ARC), MCHR1 is found in cilia at comparable levels to controls,  
255 Mchr1:ACIII double positive cilia are significantly reduced in the paraventricular nucleus (PVN)  
256 of *Bbs5<sup>ΔΔ</sup>* mice compared to controls (p=0.0024) (**Figure 3C**). We did not observe overt  
257 differences in the frequency or length of the cilium in the *Bbs5<sup>ΔΔ</sup>* compared to controls. Together,  
258 these data suggest that changes in ciliary composition and subsequent signaling may initiate the  
259 obesity phenotype in adults and is not solely due to developmental patterning of the  
260 hypothalamus in this ciliopathy model.

261  
262 *Decreased endochondral bone length in Bbs5 mutant mice*

263 Surviving *Bbs5<sup>-/-</sup>* congenital mice displayed skeletal abnormalities as measured by an overall  
264 decrease in length from the tip of the nasal bone to the pubic symphysis (**Figure 4A**). This  
265 difference is present in both *Bbs5<sup>-/-</sup>* (p<.001) and *Bbs5<sup>+/-</sup>* (p<.001) mice compared to wild-type  
266 littermates. A decrease in the length of long bones, as represented by shortened femurs (**Figure**  
267 **4B**) follows a similar trend in both *Bbs5<sup>-/-</sup>* (p<0.001) and *Bbs5<sup>+/-</sup>* (p<0.001) mice compared to  
268 wild-type littermates. During our gross inspection of the skeletons, we also noted that none of  
269 the *Bbs5<sup>-/-</sup>* mutant mice analyzed exhibited polydactyly. While this phenotype is commonly

270 observed in human BBS patients, it has not been observed in any BBS mutant mouse models  
271 to date (11-13).

272  
273 *Bbs5*<sup>-/-</sup> animals postnatally develop shortened craniofacial bones.

274 Craniofacial abnormalities in adult *Bbs5*<sup>-/-</sup> mice were observed in the skull (lateral view  
275 **Figure 4C**, overhead view **Figure 4D**). Skull length in adult mice measured from the tip of the  
276 nasal bone to the back of the skull is significantly different among the genotypes. For example,  
277 between wild-type *Bbs5*<sup>+/+</sup> and knockout *Bbs5*<sup>-/-</sup> animals, the distance is shorter in knockouts  
278 ( $p < 0.001$ ). Interestingly, we also observe significant differences between wild-type (*Bbs5*<sup>+/+</sup>) and  
279 heterozygous (*Bbs5*<sup>+/-</sup>) animals ( $p < 0.05$ ) and between *Bbs5*<sup>+/-</sup> and *Bbs5*<sup>-/-</sup> ( $p < 0.001$ ) (**Figure 4E**).  
280 These phenotypes were not present in E18.5 skulls analyzed, suggesting a role for *Bbs5* in later  
281 stages of cranial development and growth (**Figure 4F**). These data are similar to previous  
282 reports of craniofacial abnormalities in other BBSome mutant animals. (13, 29)

283 Skeletal analysis also revealed structural abnormalities and a persistence of the  
284 buccohypophyseal canal in the basisphenoid bone at the base of the skull in E18.5 *Bbs5*<sup>-/-</sup>  
285 embryos (**Figure 4G**) and in adult *Bbs5*<sup>-/-</sup> animals (**Figure 4H**). These phenotypes are not  
286 observed in *Bbs5*<sup>+/-</sup> or wild-type mice. The buccohypophyseal canal is an ancestral vertebrate  
287 structure that typically disappears in mammals during development to generate a barrier  
288 between the pituitary gland and the oral cavity. The persistence of this canal was also described  
289 in *Gas1* knockout animals, which show reduced Sonic Hedgehog (Hh) signaling at the midline,  
290 along with pituitary development abnormalities in *Ift88* conditional (*Wnt-1Cre*), *Ofd1*, and *Kif3a*  
291 cilia mutant mice. This was attributed to altered regulation of the Hh signaling pathway in the  
292 midline of the associated embryos (30). Until now the only other reported case of basisphenoid  
293 abnormalities in BBS mice has been in BBS3/*Arl6* congenital mutant models, which is not a  
294 member of the core BBSome complex (19).

295  
296 *Brain and pituitary abnormalities in Bbs5 mutant mice.*

297 A potential cause for the smaller size of the *Bbs5*<sup>-/-</sup> mutant mice, along with defects in  
298 sperm production and abnormal bone length could be pituitary gland dysfunction. (31) This  
299 possibility is supported by the persistence of the buccohypophyseal canal in *Bbs5*<sup>-/-</sup> mice as well  
300 as BBS patients presenting with pituitary abnormalities (32). To further assess the pituitary gland

301 in the *Bbs5*<sup>-/-</sup>, we performed magnetic resonance imaging (MRI) on heads of control and  
302 congenital mutants as well as conditional mutants where *Bbs5* loss was induced early (P7) and  
303 in adults (8 week old) (**Supplemental video 2**). Sagittal cross-sections of MRI images indicate  
304 that the mutant pituitary glands exhibit abnormal morphology with ectopic expansions caudally  
305 which were never observed in wild-type control littermates (3/5 mutant animals, **Figure 5A**).  
306 Importantly, histological analysis of sections through the pituitary gland in mutants that did not  
307 show structural abnormalities by MRI, revealed cellular abnormalities such as irregular  
308 boundaries and hyperplastic expansion between the Pars Intermedia (PI) and Pars Distalis (PD)  
309 regions. These abnormalities would not be identifiable by MRI analysis (**Figure 5B** and **5C**) and  
310 include irregular boundaries between the PI and Pars Distalis (PD) with neoplastic growths  
311 exhibited in the PI. Immunofluorescence staining using an antibody to the small GTPase Arl13b  
312 indicates that the wild-type Pars Nervosa (PN) region is sparsely ciliated, or lack Arl13b positive  
313 cilia, but the PI and PD are heavily ciliated (**Figure 5D**). In *Bbs5*<sup>-/-</sup> mutants the PI shows a  
314 reduction in Arl13b staining compared to wild-type (**Figure 5D**). The PD region *Bbs5*<sup>-/-</sup> mutant  
315 MRI analysis indicates that the pituitary glands in *Bbs5*<sup>-/-</sup> mutant mice are also significantly  
316 smaller (**Figure 5E**,  $p \leq 0.01$ ). Future studies of these pituitary abnormalities may reveal how  
317 they contribute to the clinical features of BBS.

318 Similar to other BBS models (12), adult (2-4 months old) *Bbs5*<sup>-/-</sup> mice exhibit the  
319 characteristic ventriculomegaly with an increase in the volume of the lateral ventricles ( $p < 0.001$ ).  
320 Interestingly, conditional mice that have been induced at either juvenile or adult timepoints, and  
321 imaged 2 and 4 months following Cre induction respectively, ventriculomegaly was not observed.  
322 (**Figure 5F**). In *Bbs5*<sup>-/-</sup> mice, the overall volume of the olfactory bulb (**Figure 5G**,  $p < 0.001$ ) and  
323 cortex (**Figure 5H**  $p < 0.05$ ) are reduced. These data suggest that some of the neural anatomical  
324 phenotypes observed in BBS are due to their roles in early postnatal development and not in  
325 adult homeostasis.

326

## 327 Discussion

328 Classic BBS-associated obesity is observed in these animals. Most BBS obesity studies  
329 have been performed in congenital models. However, this study specifically utilizes a conditional  
330 allele for neuronal receptor localization studies. This allows for the interpretation of the  
331 consequences of BBS5 loss independent of developmental defects. Due to the fact that obesity

332 occurs when induced at both juvenile and adult time points, it can be determined that obesity is  
333 driven by a process that occurs throughout the lifespan of the animal. Furthermore, the  
334 observations that POMC neuron number remains normal, cilia number is unaffected, and  
335 MCHR1 is trafficking appear normal (except minor defects in the PVN) in the hypothalamus  
336 distinguishes the conditional model from other BBS congenital mutant models (26, 28). These  
337 data suggest that obesity is being driven by alternative mechanisms than what have been  
338 proposed previously. Follow up studies will focus on comparing the congenital BBS5 mutant  
339 obesity with the conditional BBS5 mutant obesity to determine if loss of BBS drives the obesity  
340 phenotype through the same mechanism.

341

342 Congenital loss of BBS5 consistently results in a lack of flagellated sperm. Similarly, loss of  
343 BBS5 in a juvenile mouse shows a mixed impact on sperm flagellation. In contrast, disruption of  
344 BBS5 in adults has no impact on spermatogenesis. Based on these data, the fertility defects  
345 observed in male mutant mice are likely to be the consequence of developmental abnormalities.  
346 Spermatogenesis is dependent on several mechanisms including, but not limited to, proper  
347 neuronal signaling to coordinate Gonadotropin Releasing Hormone (GnRH) release followed by  
348 Folicle Stimulating hormone (FSH) and the proper function of the hypothalamus-pituitary-gonadal  
349 axis for proper tissue autonomous regulation of FSH and androgens (33). Cilia have been shown  
350 to play a role in regulating neuronal activity of GnRH neurons. The cilia on these neurons express  
351 the Kisspeptin receptor (Kiss1r), which is responsible for responding to kisspeptin and regulating  
352 the onset of puberty (22). The resulting animals that form flagellated sperm may be a result of  
353 the timing and efficiency of induction during a critical window in the initial wave of  
354 spermatogenesis. The high turnover rate of sperm production would indicate that, if BBS5 is  
355 necessary for spermatogenesis, its loss should affect sperm formation regardless of age of  
356 induction. Instead we note that loss of BBS5 in adult animals does not affect sperm production.  
357 This supports a role for BBS5 during initial spermatogenesis but not directly in flagella formation.  
358 These observations regarding fertility, paired with the skeletal abnormalities at the cranial base,  
359 and pituitary abnormalities point to hormonal dysregulation as a potential culprit driving the  
360 phenotypes observed in *Bbs5* mutant mice.

361 In addition to being smaller in size, pituitary glands in three out of five of these mice have  
362 defects that are visible by MRI analysis. The remaining two have defects visible following

363 histological analysis. This result points to the possibility that pituitary dysfunction in these  
364 animals may be a result of defects in the developmental process itself. The observation that the  
365 primary cilia in *Bbs5*<sup>-/-</sup> pituitaries are also affected indicates that there may be further hinderance  
366 of pituitary function that is a direct result of ciliary signaling dysfunction, although this awaits  
367 more detailed analysis.

368 Overall our studies highlight several requirements for BBS5 in regulating the development  
369 of the axial and craniofacial skeleton. While craniofacial abnormalities have been reported in  
370 mouse models of BBS (13, 29), the only other reported case of basisphenoid abnormalities, as  
371 we observe in *Bbs5* mutants, is in *Bbs3/Arl6* congenital mutant models (19). This canal is  
372 hypothesized to be reminiscent of the transient developmental structure, Rathke's pouch. During  
373 mammalian pituitary development the basal diencephalon gives rise to neuroectoderm, which  
374 along with oral epithelium, migrates via Rathke's Pouch through the developing palatine bone to  
375 form the anterior pituitary. In contrast, the posterior pituitary, is derived from the neural ectoderm  
376 (34). In addition to the observation that the pituitary in *Bbs5*<sup>-/-</sup> mutant mice are structurally  
377 compromised compared to wild-type animals, points to possible hormonal dysregulation in these  
378 mutant mice. Defects in pituitary hormonal regulation could also underlie the developmental  
379 defects such as bone length and reproductive abnormalities observed in *Bbs5*<sup>-/-</sup> mutant mice.  
380 Furthermore, pituitary abnormalities such as hypoplasia, small Rathke's cleft cyst, and pituitary  
381 enlargement have recently been reported in the BBS patient population (35). Thus, the BBS5  
382 model described here will be a good model in which to explore the hypothalamus-pituitary-  
383 gonadal axis defects associated with disruption of the BBSome.

384 The development of the pituitary is an event that requires the tightly regulated  
385 synchronization of interactions between and migration of both the neural ectoderm and Rathke's  
386 pouch derived from the oral ectoderm. It has been shown that abnormalities in the development  
387 of the pituitary can result in the persistence of the buccohypophyseal canal (30). In work done  
388 by the Dupé lab, there is a similar persistence of the buccohypophyseal canal in mice that are  
389 haploinsufficient for *Sonic Hedgehog (Shh)* (36). This becomes more severe in animals that are  
390 heterozygous for both *Shh* and the Notch pathway gene, *Rbpj*. These data indicate a  
391 requirement for both Shh and Notch signaling in closing of the buccohypophyseal canal. This  
392 points to the developing pituitary as a unique region within the embryo that is sensitive to the  
393 level of activity of the Shh and Notch pathways combined. It is widely accepted that canonical

394 Hh signaling is dependent on the presence of the primary cilium. *Bbs5* mutant animals do not  
395 exhibit classic Hh signaling defects (e.g. dorsal ventral neural tube patterning defects,  
396 polydactyly) suggesting that it is largely unaffected in most of the embryo. This study suggests  
397 that the loss of *Bbs5* specifically in the developing pituitary may be just enough to predispose  
398 animals to subtle Hh-associated pituitary abnormalities. This is further supported by disruption  
399 of *Arl13b* signaling in the intermediate region of mutant pituitaries, as *Arl13b* is also known to  
400 regulate *Shh* signaling events (37, 38). Of course, this result does not indicate whether cilia are  
401 still present, but unable to traffic *Arl13b*, or that cilia are absent altogether from the Pars  
402 intermedia in mutant mice. Attempts to answer this question included using traditional ciliary  
403 markers for ACIII, IFT components, and Acetylated  $\alpha$ -tubulin were unsuccessful due to lack of  
404 expression of ACIII in the pituitary and difficulty getting the remaining antibodies to work in  
405 neuronal tissues. Based on the current understanding of BBSome function, it would be unlikely  
406 that the cilium is not present. Alternatively, a loss of cilia in the Pars intermedia could be a result  
407 of cell differentiation abnormalities, which may cause variability in cell types that may or may not  
408 be ciliated normally. Further investigation into the role of the primary cilium and the BBSome in  
409 pituitary development is necessary to definitively answer these questions.

410 By performing MRIs on congenital and conditional *Bbs5* mutant mice, we were not only  
411 able to identify structural abnormalities in the pituitary, but also to further expand on the classic  
412 BBS phenotype, ventriculomegaly. Based on the MRI data, the *Bbs5*<sup>-/-</sup> mice also have a  
413 reduction in cortical and olfactory bulb volume. MRIs performed on both juvenile and adult  
414 induced conditional *Bbs5* mutant animals addressed whether these phenotypes are a result of  
415 developmental consequence of loss of BBS5 or a requirement for BBS5 in normal tissue  
416 function. Conditional ablation of *Bbs5* at both juvenile and adult stages does not appear to result  
417 in enlarged ventricles.

418 In summary, the *Bbs5* mutant mouse described here will be a good model to evaluate  
419 multiple phenotypes associated with BBS patients. Importantly, this includes pituitary defects.  
420 Pituitary abnormalities have been reported in both BBS and Joubert Syndrome (JBTS; OMIM  
421 213300) patients (35, 39). This study is the first to show defects in pituitary development in a  
422 BBS mouse model. While not yet considered one of the classic pathologies associated with  
423 BBS or other ciliopathies, perhaps some of the underlying pathologies in patients are driven by  
424 a dysfunctional pituitary. Indeed, pituitary abnormalities have been noted in a study of a small

425 number of BBS patients (35). This could also explain why mutation of *Bbs5* results in tissue  
426 specific phenotypes, which is unexpected given that *Bbs5* is thought to be expressed in all  
427 ciliated cells. Differences between this this model and other mouse models of BBS may provide  
428 evidence that mutations to BBS5 specifically target the pituitary. This evidence provides valuable  
429 insight into the mechanisms driving the disease state and may provide critical opportunities for  
430 pituitary-focused clinical intervention.

431

### 432 **Abbreviations**

433 MEF: Mouse Embryonic Fibroblasts, ARC: Arcuate Nucleus, BBS: Bardet-Biedl Syndrome, IFT:  
434 Intraflagellar Transport, SHH: Sonic Hedgehog, ACIII: Adenylate cyclase III, MCHR1: Melanin  
435 Concentrating Hormone Receptor 1, PVN: Paraventricular Nucleus, PN: Pars Nervosa, PI: Pars  
436 Intermedia, PD: Pars Distalis, MRI: Magnetic Resonance Imaging

437

### 438 **Interest Statement**

439 The authors have no competing interests to declare.

440

### 441 **Funding**

442 This work was supported by National Institutes of Health [2R01DK065655 to BKY,  
443 F31HL150898 and 5T32HL007918-20 to MRB, R01DK114008 to NFB].

444

### 445 **Acknowledgements**

446 We would like to thank the members of Dr. Bradley K. Yoder's and Dr. Nicolas F. Barbari's,  
447 laboratories for intellectual and technical support on the project. We would like to thank Dr. John  
448 Totenhagen, Dr. Anna Sorace and the support of the Small Animal Imaging Shared Facility  
449 (UAB). We would like to thank Dr. Sally Camper and her laboratory in the Department of Human  
450 Genetics at The University of Michigan for guidance and expertise in the area of pituitary gland  
451 development. We would like to thank the National Institute of Diabetes and Digestive and Kidney  
452 Diseases and the National Heart, Lung, and Blood Institute for financial support of these studies.

453

454

455

### References



- 456 1 Garcia, G., 3rd, Raleigh, D.R. and Reiter, J.F. (2018) How the Ciliary Membrane Is  
457 Organized Inside-Out to Communicate Outside-In. *Curr Biol*, **28**, R421-R434.
- 458 2 Nachury, M.V., Loktev, A.V., Zhang, Q., Westlake, C.J., Peranen, J., Merdes, A.,  
459 Slusarski, D.C., Scheller, R.H., Bazan, J.F., Sheffield, V.C. *et al.* (2007) A core complex of  
460 BBS proteins cooperates with the GTPase Rab8 to promote ciliary membrane biogenesis. *Cell*,  
461 **129**, 1201-1213.
- 462 3 Loktev, A.V., Zhang, Q., Beck, J.S., Searby, C.C., Scheetz, T.E., Bazan, J.F., Slusarski,  
463 D.C., Sheffield, V.C., Jackson, P.K. and Nachury, M.V. (2008) A BBSome subunit links  
464 ciliogenesis, microtubule stability, and acetylation. *Dev Cell*, **15**, 854-865.
- 465 4 Xue, B., Liu, Y.X., Dong, B., Wingfield, J.L., Wu, M., Sun, J., Lechtreck, K.F. and Fan,  
466 Z.C. (2020) Intraflagellar transport protein RABL5/IFT22 recruits the BBSome to the basal  
467 body through the GTPase ARL6/BBS3. *Proc Natl Acad Sci U S A*, in press.
- 468 5 Jin, H., White, S.R., Shida, T., Schulz, S., Aguiar, M., Gygi, S.P., Bazan, J.F. and  
469 Nachury, M.V. (2010) The conserved Bardet-Biedl syndrome proteins assemble a coat that  
470 traffics membrane proteins to cilia. *Cell*, **141**, 1208-1219.
- 471 6 Mourao, A., Nager, A.R., Nachury, M.V. and Lorentzen, E. (2014) Structural basis for  
472 membrane targeting of the BBSome by ARL6. *Nat Struct Mol Biol*, **21**, 1035-1041.
- 473 7 Seo, S., Zhang, Q., Bugge, K., Breslow, D.K., Searby, C.C., Nachury, M.V. and  
474 Sheffield, V.C. (2011) A novel protein LZTFL1 regulates ciliary trafficking of the BBSome and  
475 Smoothens. *PLoS Genet*, **7**, e1002358.
- 476 8 Yang, S., Bahl, K., Chou, H.T., Woodsmith, J., Stelzl, U., Walz, T. and Nachury, M.V.  
477 (2020) Near-atomic structures of the BBSome reveal the basis for BBSome activation and  
478 binding to GPCR cargoes. *Elife*, **9**.
- 479 9 Manara, E., Paolacci, S., D'Esposito, F., Abeshi, A., Ziccardi, L., Falsini, B., Colombo,  
480 L., Iarossi, G., Pilotta, A., Boccone, L. *et al.* (2019) Mutation profile of BBS genes in patients  
481 with Bardet-Biedl syndrome: an Italian study. *Ital J Pediatr*, **45**, 72.
- 482 10 Li, J.B., Gerdes, J.M., Haycraft, C.J., Fan, Y., Teslovich, T.M., May-Simera, H., Li, H.,  
483 Blacque, O.E., Li, L., Leitch, C.C. *et al.* (2004) Comparative genomics identifies a flagellar and  
484 basal body proteome that includes the BBS5 human disease gene. *Cell*, **117**, 541-552.
- 485 11 Kulaga, H.M., Leitch, C.C., Eichers, E.R., Badano, J.L., Lesemann, A., Hoskins, B.E.,  
486 Lupski, J.R., Beales, P.L., Reed, R.R. and Katsanis, N. (2004) Loss of BBS proteins causes  
487 anosmia in humans and defects in olfactory cilia structure and function in the mouse. *Nat*  
488 *Genet*, **36**, 994-998.
- 489 12 Davis, R.E., Swiderski, R.E., Rahmouni, K., Nishimura, D.Y., Mullins, R.F.,  
490 Agassandian, K., Philp, A.R., Searby, C.C., Andrews, M.P., Thompson, S. *et al.* (2007) A  
491 knockin mouse model of the Bardet-Biedl syndrome 1 M390R mutation has cilia defects,  
492 ventriculomegaly, retinopathy, and obesity. *Proc Natl Acad Sci U S A*, **104**, 19422-19427.
- 493 13 Nishimura, D.Y., Fath, M., Mullins, R.F., Searby, C., Andrews, M., Davis, R., Andorf,  
494 J.L., Mykityn, K., Swiderski, R.E., Yang, B. *et al.* (2004) Bbs2-null mice have neurosensory  
495 deficits, a defect in social dominance, and retinopathy associated with mislocalization of  
496 rhodopsin. *Proc Natl Acad Sci U S A*, **101**, 16588-16593.
- 497 14 Zhang, Q., Seo, S., Bugge, K., Stone, E.M. and Sheffield, V.C. (2012) BBS proteins  
498 interact genetically with the IFT pathway to influence SHH-related phenotypes. *Hum Mol*  
499 *Genet*, **21**, 1945-1953.

- 500 15 Tadenev, A.L., Kulaga, H.M., May-Simera, H.L., Kelley, M.W., Katsanis, N. and Reed,  
501 R.R. (2011) Loss of Bardet-Biedl syndrome protein-8 (BBS8) perturbs olfactory function,  
502 protein localization, and axon targeting. *Proc Natl Acad Sci U S A*, **108**, 10320-10325.
- 503 16 Kretschmer, V., Patnaik, S.R., Kretschmer, F., Chawda, M.M., Hernandez-Hernandez,  
504 V. and May-Simera, H.L. (2019) Progressive Characterization of Visual Phenotype in Bardet-  
505 Biedl Syndrome Mutant Mice. *Invest Ophthalmol Vis Sci*, **60**, 1132-1143.
- 506 17 Bales, K.L., Bentley, M.R., Croyle, M.J., Kesterson, R.A., Yoder, B.K. and Gross, A.K.  
507 (2020) BBSome Component BBS5 Is Required for Cone Photoreceptor Protein Trafficking and  
508 Outer Segment Maintenance. *Invest Ophthalmol Vis Sci*, **61**, 17.
- 509 18 Breslow, D.K. and Nachury, M.V. (2015) Analysis of soluble protein entry into primary  
510 cilia using semipermeabilized cells. *Methods Cell Biol*, **127**, 203-221.
- 511 19 Kawasaki, M., Izu, Y., Hayata, T., Ideno, H., Nifuji, A., Sheffield, V.C., Ezura, Y. and  
512 Noda, M. (2017) Bardet-Biedl syndrome 3 regulates the development of cranial base midline  
513 structures. *Bone*, **101**, 179-190.
- 514 20 Weihbrecht, K., Goar, W.A., Carter, C.S., Sheffield, V.C. and Seo, S. (2018) Genotypic  
515 and phenotypic characterization of the *Sdccag8Tn(sb-Tyr)2161B.CA1C2Ove* mouse model.  
516 *PLoS One*, **13**, e0192755.
- 517 21 Ross, A.J., May-Simera, H., Eichers, E.R., Kai, M., Hill, J., Jagger, D.J., Leitch, C.C.,  
518 Chapple, J.P., Munro, P.M., Fisher, S. *et al.* (2005) Disruption of Bardet-Biedl syndrome ciliary  
519 proteins perturbs planar cell polarity in vertebrates. *Nat Genet*, **37**, 1135-1140.
- 520 22 Koemeter-Cox, A.I., Sherwood, T.W., Green, J.A., Steiner, R.A., Berbari, N.F., Yoder,  
521 B.K., Kauffman, A.S., Monsma, P.C., Brown, A., Askwith, C.C. *et al.* (2014) Primary cilia  
522 enhance kisspeptin receptor signaling on gonadotropin-releasing hormone neurons. *Proc Natl*  
523 *Acad Sci U S A*, **111**, 10335-10340.
- 524 23 d'Anglemont de Tassigny, X., Fagg, L.A., Dixon, J.P., Day, K., Leitch, H.G., Hendrick,  
525 A.G., Zahn, D., Franceschini, I., Caraty, A., Carlton, M.B. *et al.* (2007) Hypogonadotropic  
526 hypogonadism in mice lacking a functional *Kiss1* gene. *Proc Natl Acad Sci U S A*, **104**, 10714-  
527 10719.
- 528 24 Davenport, J.R., Watts, A.J., Roper, V.C., Croyle, M.J., van Groen, T., Wyss, J.M.,  
529 Nagy, T.R., Kesterson, R.A. and Yoder, B.K. (2007) Disruption of intraflagellar transport in  
530 adult mice leads to obesity and slow-onset cystic kidney disease. *Curr Biol*, **17**, 1586-1594.
- 531 25 Wang, L., De Solis, A.J., Goffer, Y., Birkenbach, K.E., Engle, S.E., Tanis, R., Levenson,  
532 J.M., Li, X., Rausch, R., Purohit, M. *et al.* (2019) Ciliary gene *RPGRIP1L* is required for  
533 hypothalamic arcuate neuron development. *JCI Insight*, **4**.
- 534 26 Seo, S., Guo, D.F., Bugge, K., Morgan, D.A., Rahmouni, K. and Sheffield, V.C. (2009)  
535 Requirement of Bardet-Biedl syndrome proteins for leptin receptor signaling. *Hum Mol Genet*,  
536 **18**, 1323-1331.
- 537 27 Berbari, N.F., Pasek, R.C., Malarkey, E.B., Yazdi, S.M., McNair, A.D., Lewis, W.R.,  
538 Nagy, T.R., Kesterson, R.A. and Yoder, B.K. (2013) Leptin resistance is a secondary  
539 consequence of the obesity in ciliopathy mutant mice. *Proc Natl Acad Sci U S A*, **110**, 7796-  
540 7801.
- 541 28 Berbari, N.F., Lewis, J.S., Bishop, G.A., Askwith, C.C. and Myktyyn, K. (2008) Bardet-  
542 Biedl syndrome proteins are required for the localization of G protein-coupled receptors to  
543 primary cilia. *Proc Natl Acad Sci U S A*, **105**, 4242-4246.
- 544 29 Tobin, J.L., Di Franco, M., Eichers, E., May-Simera, H., Garcia, M., Yan, J., Quinlan, R.,  
545 Justice, M.J., Hennekam, R.C., Briscoe, J. *et al.* (2008) Inhibition of neural crest migration

546 underlies craniofacial dysmorphology and Hirschsprung's disease in Bardet-Biedl syndrome.  
547 *Proc Natl Acad Sci U S A*, **105**, 6714-6719.

548 30 Khonsari, R.H., Seppala, M., Pradel, A., Dutel, H., Clement, G., Lebedev, O., Ghafoor,  
549 S., Rothova, M., Tucker, A., Maisey, J.G. *et al.* (2013) The buccohypophyseal canal is an  
550 ancestral vertebrate trait maintained by modulation in sonic hedgehog signaling. *BMC Biol*, **11**,  
551 27.

552 31 Andersen, B., Pearse, R.V., 2nd, Jenne, K., Sornson, M., Lin, S.C., Bartke, A. and  
553 Rosenfeld, M.G. (1995) The Ames dwarf gene is required for Pit-1 gene activation. *Dev Biol*,  
554 **172**, 495-503.

555 32 Bonfrate, A., Farah, J., De Marzi, L., Delacroix, S., Herault, J., Sayah, R., Lee, C.,  
556 Bolch, W.E. and Clairand, I. (2016) Influence of beam incidence and irradiation parameters on  
557 stray neutron doses to healthy organs of pediatric patients treated for an intracranial tumor with  
558 passive scattering proton therapy. *Phys Med*, **32**, 590-599.

559 33 O'Shaughnessy, P.J. (2014) Hormonal control of germ cell development and  
560 spermatogenesis. *Semin Cell Dev Biol*, **29**, 55-65.

561 34 Larkin, S. and Ansorge, O. (2000) Feingold, K.R., Anawalt, B., Boyce, A., Chrousos, G.,  
562 Dungan, K., Grossman, A., Hershman, J.M., Kaltsas, G., Koch, C., Kopp, P., Korbonits, M.,  
563 McLachlan, R., Morley, J.E., New, M., Perreault, L., Purnell, J., Rebar, R., Singer, F., Trence,  
564 D.L., Vinik, A. and Wilson, D.P. (eds.), In *Endotext*, South Dartmouth (MA), in press.

565 35 Guran, T., Ekinici, G., Atay, Z., Turan, S., Akcay, T. and Bereket, A. (2011) Radiologic  
566 and hormonal evaluation of pituitary abnormalities in patients with Bardet-Biedl syndrome. *Clin*  
567 *Dysmorphol*, **20**, 26-31.

568 36 Hamdi-Roze, H., Ware, M., Guyodo, H., Rizzo, A., Ratie, L., Rupin, M., Carre, W., Kim,  
569 A., Odent, S., Dubourg, C. *et al.* (2020) Disrupted Hypothalamo-Pituitary Axis in Association  
570 With Reduced SHH Underlies the Pathogenesis of NOTCH-Deficiency. *J Clin Endocrinol*  
571 *Metab*, **105**.

572 37 Mariani, L.E., Bijlsma, M.F., Ivanova, A.A., Suciu, S.K., Kahn, R.A. and Caspary, T.  
573 (2016) Arl13b regulates Shh signaling from both inside and outside the cilium. *Mol Biol Cell*, in  
574 press.

575 38 Gigante, E.D. and Caspary, T. (2020) Signaling in the primary cilium through the lens of  
576 the Hedgehog pathway. *Wiley Interdiscip Rev Dev Biol*, in press., e377.

577 39 Niceta, M., Dentici, M.L., Ciolfi, A., Marini, R., Barresi, S., Lepri, F.R., Novelli, A., Bertini,  
578 E., Cappa, M., Digilio, M.C. *et al.* (2020) Co-occurrence of mutations in KIF7 and KIAA0556 in  
579 Joubert syndrome with ocular coloboma, pituitary malformation and growth hormone  
580 deficiency: a case report and literature review. *BMC Pediatr*, **20**, 120.

581  
582  
583  
584  
585  
586  
587  
588

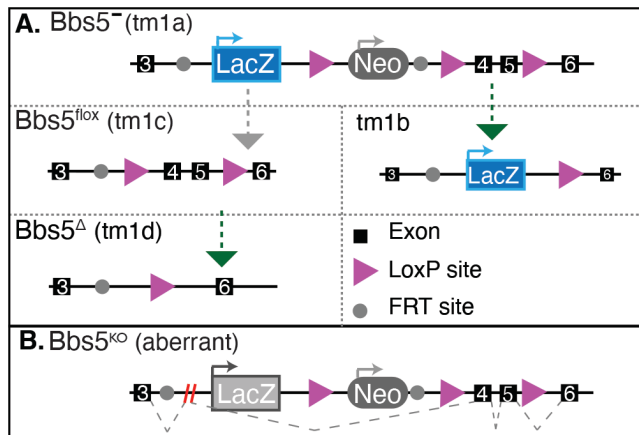

589

590

591

592

593

594

595

596

597

**Figure 1. Mouse Alleles** A) The knockout allele construct depicting the congenital knock out allele ( $tm1a$ ), floxed allele ( $tm1c$ ), and recombined alleles ( $tm1b$  and  $tm1d$ ). Exons are depicted as black boxes, *LoxP* sites as purple arrows and *FRT* sites as grey circles. Grey arrows indicate that a FLP<sub>O</sub> mouse was used to generate the subsequent allele. Green arrows indicate that a Cre-expressing mouse was used to generate the subsequent allele. B) The  $tm1a$  allele, as verified by sequencing of the resulting cDNA, results in an alternatively spliced allele excluding both the LacZ and Neo coding regions.

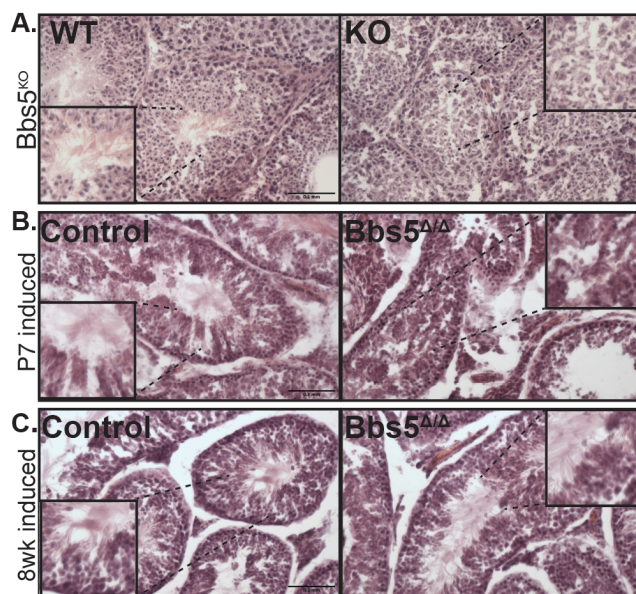

598

599

300

301

302

**Figure 2. Testes Analysis** H&E staining of testes in A) Wild-type and  $Bbs5^{-/}$  mice, B) Juvenile induced conditionals and C) adult induced conditionals. Staining shows the presence of flagellated sperm in WT,  $Bbs5^{ff}$ , and adult induced  $Bbs5^{\Delta/\Delta}$  animals versus the lack of flagellated sperm in  $Bbs5^{-/}$  and juvenile induced  $Bbs5^{\Delta/\Delta}$  mice. (Scale bar 0.1mm)

303

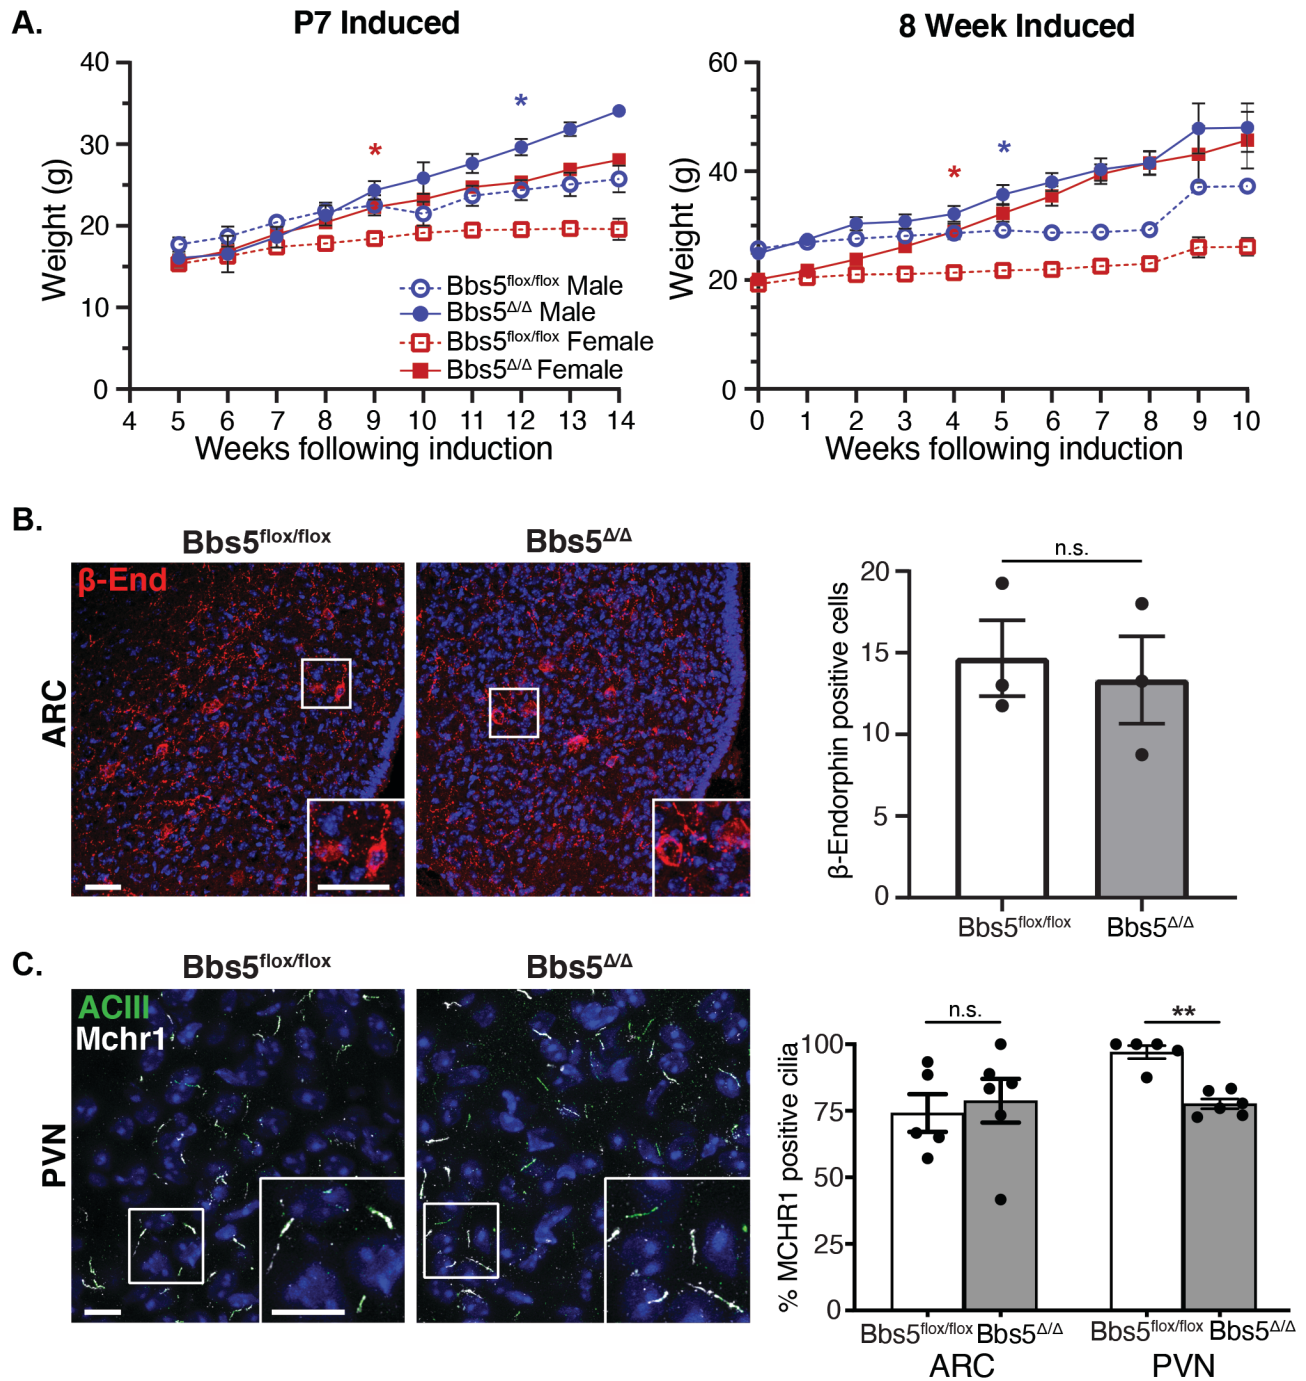

304

305 **Figure 3. Obesity and Neuronal Cilia** A) Body weight measurement after conditional loss of

306 *Bbs5*. (Left graph) Weights of male and female *Bbs5<sup>ff</sup>* and *Bbs5<sup>ΔΔ</sup>* mice following induction on

307 postnatal day 7, N = 4 ♂ & 3 ♀ controls and 3 ♂ & 2 ♀ mutants. (Right graph) weights following

308 adult induction at 8 weeks old (Adult Induced), N = 9 ♂ & 7 ♀ controls and 8 ♂ & 12 ♀ mutants.

309 Asterix represent initial significant differences ( $P < 0.05$ ) using a mixed-effects analysis with  
310 multiple comparisons. Error bars represent SEM B) POMC neuron immunofluorescence in the  
311 Arcuate Nucleus (ARC) for  $\beta$ -endorphin ( $\beta$ -end, red) in control and adult induced mutant males  
312 (*Bbs5<sup>ΔΔ</sup>*). (Right graph) Number of  $\beta$ -endorphin positive cells per section of ARC was not  
313 significantly different (n.s.) between genotypes in three males per group using a Students T-test.  
314 Scale bar 10 $\mu$ m. N = 3 control and mutant ♂ C) Primary cilia immunofluorescence for cilia marker  
315 adenylate cyclase III (ACIII, green) and cilia GPCR, melanin concentrating hormone receptor 1  
316 (Mchr1, gray) in the Paraventricular Nucleus (PVN). (Right graph) Quantification of ACIII and  
317 Mchr1 double positive cilia in ARC and PVN revealed no significant differences in the ARC (n.s.)  
318 but reduced double positive cilia in PVN were observed using Student T-test ( $P < 0.01$ ). Scale  
319 bar= 10 $\mu$ m. N = 3 ♂ & 2 ♀ controls and 3 ♂ & 3 ♀ mutants. All Hoechst stained nuclei blue. \*  
320  $p \leq 0.05$ , \*\*  $p \leq 0.01$ , \*\*\*  $p \leq 0.001$   
321

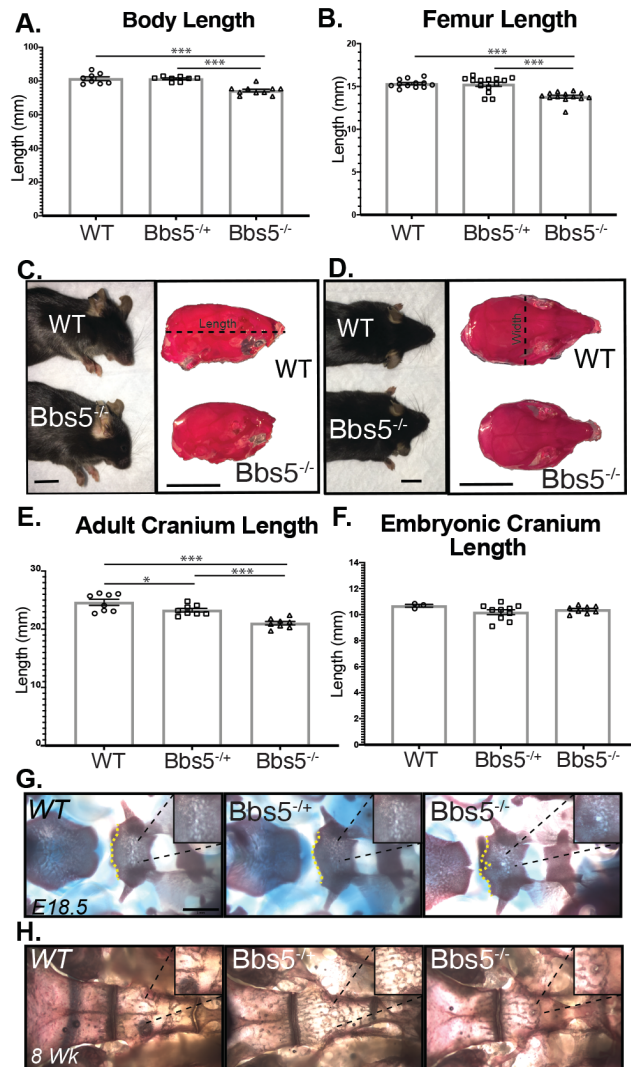

322

323

324

325

326

327

328

329

330

331

332

333

**Figure 4. Skeletal Analysis.** *Bbs5*<sup>-/-</sup> mice exhibit craniofacial and skeletal abnormalities. Measurements of and A) skeleton length N = 8 controls, 8 heterozygotes, and 10 mutants. and B) femur length, N= 12 control, 14 heterozygous, and 13 mutant femurs at 8 weeks old. C) Sideview of WT (top, left) and *Bbs5*<sup>-/-</sup> (bottom, left) animals and skulls of WT (top, right) and *Bbs5*<sup>-/-</sup> (bottom, right) that have been stained with alizarin red. (scale bar= 1mm). D) Overhead view of WT (top, left) and *Bbs5*<sup>-/-</sup> (bottom, left) animals and skulls of WT (top, right) and *Bbs5*<sup>-/-</sup> (bottom, right) that have been stained with alizarin red. (scale bar =1mm). E) Cranium Lengths in 2 month old WT, *Bbs5*<sup>+/-</sup>, and *Bbs5*<sup>-/-</sup> animals, N=8, 8, and 8 respectively. F) Cranium Lengths in E18.5 WT, *Bbs5*<sup>+/-</sup>, and *Bbs5*<sup>-/-</sup> animals, N= 3,10, and 8 respectively. Alizarin red and alcian blue staining of WT, *Bbs5*<sup>+/-</sup>, and *Bbs5*<sup>-/-</sup> cranial base (dorsal aspect) at G) E18.5 and H) 2 months old. For measurements, length was measured from the back of the skull to the tip of the

334 nasal bone (dotted line in panel c). Error bars represent Standard error. Significance was  
335 determined via unpaired Ttest. \*  $p \leq 0.05$ , \*\*  $p \leq 0.01$ , \*\*\*  $p \leq 0.001$

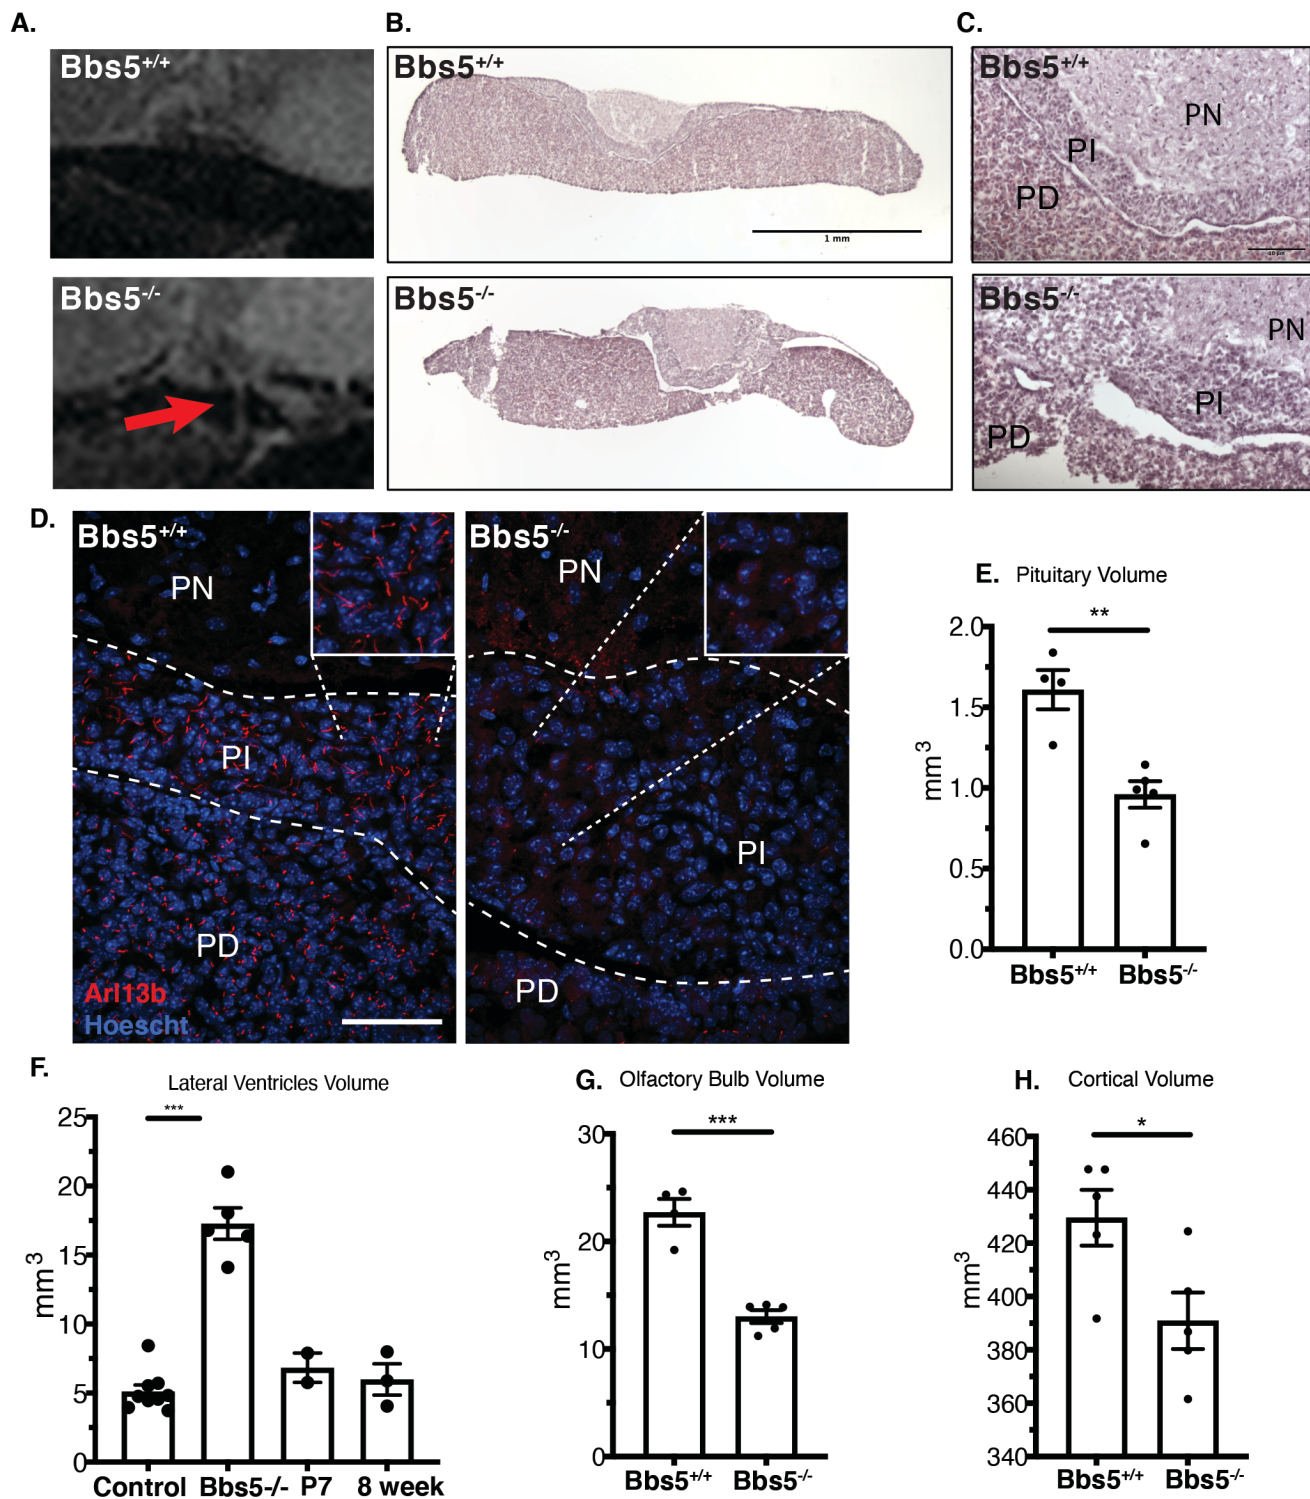



337 **Figure 5.** A) Sagittal cross section of pituitary MR images reveals structural abnormalities in  
338 *Bbs5*<sup>-/-</sup> animals compared to controls (red arrows). B) H&E histology of the pituitary (scale bar  
339 = 1mm), C) magnified H&E staining of the PN, PI and PD regions of the pituitary (scale bar  
340 =10  $\mu$ m). D) Immunofluorescence staining of cilia in the pituitary using the small GTPase  
341 Arl13b (scale bar =50  $\mu$ m). PN= Pars Nervosa, PI= Pars Intermedia, and PD= Pars Distalis.  
342 Volumetric analysis of MR Images shows a significant change in: E) Pituitary, F) lateral  
343 ventricles of KO mice compared to control and juvenile and adult induced animals: (Control  
344 includes 5 wild-type and 4 *Bbs5*<sup>ff</sup> animals, G) the olfactory bulb, H) cortex. Significance was  
345 determined via unpaired Ttest. \*  $p \leq 0.05$ , \*\*  $p \leq 0.01$ , \*\*\*  $p \leq 0.001$
